# Supplementary material for: Bilingualism Effects on the Cognitive Flexibility of Autistic Children: Evidence From Verbal Dual-Task Paradigms
Source: PubMed Central journal article supplement (PMC10198706; doi:10.1162/nol_a_00055), 2021-12-23
Supplement: nol-2-4-558-s001.pdf [file nol-2-4-558-s001.pdf]

## Supplementary Materials

### Bilingualism effects

Linear model results for listening span scores

TD groups:

|                       | Estimate | Std. Error | t value | Pr(> t )   |
|-----------------------|----------|------------|---------|------------|
| (Intercept)           | 0.49407  | 2.94548    | 0.168   | 0.86716    |
| bilinguals            | 1.40751  | 0.72490    | 1.942   | 0.05527 .  |
| age                   | 0.13663  | 0.42246    | 0.323   | 0.74712    |
| SES                   | 0.05441  | 0.12509    | 0.435   | 0.66462    |
| loc-to-glo            | 0.01241  | 0.03055    | 0.406   | 0.68550    |
| glo-to-loc            | -0.01728 | 0.01210    | -1.429  | 0.15648    |
| expressive vocabulary | 0.01537  | 0.06864    | 0.224   | 0.82334    |
| sentence repetition   | 0.05603  | 0.01912    | 2.930   | 0.00428 ** |

---

Signif. codes: 0 '\*\*\*' 0.001 '\*\*' 0.01 '\*' 0.05 '.' 0.1 ' ' 1

Autistic groups:

|             | Estimate | Std. Error | t value | Pr(> t )     |
|-------------|----------|------------|---------|--------------|
| (Intercept) | 0.48448  | 3.48859    | 0.139   | 0.88986      |
| bilinguals  | 4.25997  | 0.89202    | 4.776   | 6.91e-06 *** |
| age         | 0.09627  | 0.19115    | 0.504   | 0.61574      |
| SES         | -0.17169 | 0.10382    | -1.654  | 0.10167      |
| ADI-R total | 0.00802  | 0.06822    | 0.118   | 0.90668      |
| IQ          | 0.02689  | 0.01758    | 1.530   | 0.12949      |

|                       |          |         |        |            |
|-----------------------|----------|---------|--------|------------|
| loc-to-glo            | 0.05198  | 0.01594 | 3.261  | 0.00157 ** |
| glo-to-loc            | 0.05345  | 0.01727 | 3.096  | 0.00262 ** |
| expressive vocabulary | -0.06141 | 0.04745 | -1.294 | 0.19883    |
| sentence repetition   | 0.03063  | 0.01856 | 1.650  | 0.10240    |

---

Signif. codes: 0 '\*\*\*' 0.001 '\*\*' 0.01 '\*' 0.05 '.' 0.1 ' ' 1

## Linear model results for syntactic interference word recall scores

TD groups:

|                       | Estimate  | Std. Error | t value | Pr(> t )    |
|-----------------------|-----------|------------|---------|-------------|
| (Intercept)           | 13.040645 | 1.789006   | 7.289   | 1.1e-10 *** |
| bilinguals            | 0.794668  | 0.440283   | 1.805   | 0.0744 .    |
| age                   | -0.562773 | 0.256589   | -2.193  | 0.0308 *    |
| SES                   | -0.033466 | 0.075979   | -0.440  | 0.6606      |
| loc-to-glo            | 0.006642  | 0.018555   | 0.358   | 0.7212      |
| glo-to-loc            | 0.008152  | 0.007347   | 1.110   | 0.2701      |
| expressive vocabulary | 0.077212  | 0.041688   | 1.852   | 0.0672 .    |
| sentence repetition   | 0.024620  | 0.011613   | 2.120   | 0.0367 *    |

---

Signif. codes: 0 '\*\*\*' 0.001 '\*\*' 0.01 '\*' 0.05 '.' 0.1 ' ' 1

Autistic groups:

|             | Estimate | Std. Error | t value | Pr(> t )  |
|-------------|----------|------------|---------|-----------|
| (Intercept) | 2.40511  | 4.14525    | 0.580   | 0.56322   |
| bilinguals  | 2.72302  | 1.05992    | 2.569   | 0.01184 * |
| age         | -0.22669 | 0.22714    | -0.998  | 0.32093   |
| SES         | 0.01937  | 0.12336    | 0.157   | 0.87558   |
| ADI-R total | 0.07755  | 0.08106    | 0.957   | 0.34131   |
| IQ          | -0.01319 | 0.02089    | -0.632  | 0.52920   |
| loc-to-glo  | -0.01651 | 0.01894    | -0.872  | 0.38559   |
| glo-to-loc  | -0.02776 | 0.02052    | -1.353  | 0.17944   |

|                       |         |         |       |            |
|-----------------------|---------|---------|-------|------------|
| expressive vocabulary | 0.16230 | 0.05638 | 2.879 | 0.00499 ** |
| sentence repetition   | 0.02354 | 0.02206 | 1.067 | 0.28861    |

---

Signif. codes: 0 '\*\*\*' 0.001 '\*\*' 0.01 '\*' 0.05 '.' 0.1 ' ' 1

Linear model results for sentence comprehension in the syntactic interference word recall task

TD groups:

|                       | Estimate  | Std. Error | t value | Pr(> t )     |
|-----------------------|-----------|------------|---------|--------------|
| (Intercept)           | 12.347462 | 2.417101   | 5.108   | 1.78e-06 *** |
| bilinguals            | -1.500822 | 0.594860   | -2.523  | 0.0134 *     |
| age                   | -0.348249 | 0.346674   | -1.005  | 0.3178       |
| SES                   | 0.074509  | 0.102654   | 0.726   | 0.4698       |
| loc-to-glo            | -0.014792 | 0.025069   | -0.590  | 0.5566       |
| glo-to-loc            | -0.004822 | 0.009926   | -0.486  | 0.6283       |
| expressive vocabulary | 0.068186  | 0.056324   | 1.211   | 0.2292       |
| sentence repetition   | -0.002034 | 0.015690   | -0.130  | 0.8972       |

---

Signif. codes: 0 '\*\*\*' 0.001 '\*\*' 0.01 '\*' 0.05 '.' 0.1 ' ' 1

Autistic groups:

|             | Estimate  | Std. Error | t value | Pr(> t )   |
|-------------|-----------|------------|---------|------------|
| (Intercept) | 3.808159  | 2.944577   | 1.293   | 0.199224   |
| bilinguals  | 1.840296  | 0.752916   | 2.444   | 0.016466 * |
| age         | -0.417980 | 0.161346   | -2.591  | 0.011176 * |
| SES         | -0.009187 | 0.087632   | -0.105  | 0.916738   |
| ADI-R total | 0.010355  | 0.057584   | 0.180   | 0.857697   |
| IQ          | -0.002949 | 0.014836   | -0.199  | 0.842875   |
| loc-to-glo  | -0.001332 | 0.013454   | -0.099  | 0.921333   |

|                       |           |          |        |              |
|-----------------------|-----------|----------|--------|--------------|
| glo-to-loc            | -0.056398 | 0.014573 | -3.870 | 0.000206 *** |
| expressive vocabulary | 0.174075  | 0.040047 | 4.347  | 3.63e-05 *** |
| sentence repetition   | 0.058146  | 0.015668 | 3.711  | 0.000357 *** |

---

Signif. codes: 0 '\*\*\*' 0.001 '\*\*' 0.01 '\*' 0.05 '.' 0.1 ' ' 1

## Linear model results for proactive interference list 2

TD groups:

|                       | Estimate  | Std. Error | t value | Pr(> t ) |
|-----------------------|-----------|------------|---------|----------|
| (Intercept)           | -0.439709 | 1.176095   | -0.374  | 0.7094   |
| bilinguals            | 0.157715  | 0.289443   | 0.545   | 0.5872   |
| age                   | -0.186903 | 0.168682   | -1.108  | 0.2708   |
| SES                   | -0.052193 | 0.049949   | -1.045  | 0.2988   |
| loc-to-glo            | 0.002790  | 0.012198   | 0.229   | 0.8196   |
| glo-to-loc            | -0.002861 | 0.004830   | -0.592  | 0.5550   |
| expressive vocabulary | 0.061412  | 0.027406   | 2.241   | 0.0275 * |
| sentence repetition   | -0.011157 | 0.007635   | -1.461  | 0.1474   |

---

Signif. codes: 0 '\*\*\*' 0.001 '\*\*' 0.01 '\*' 0.05 '.' 0.1 ' ' 1

Autistic groups:

|             | Estimate   | Std. Error | t value | Pr(> t ) |
|-------------|------------|------------|---------|----------|
| (Intercept) | -4.2202205 | 1.7148802  | -2.461  | 0.0158 * |
| bilinguals  | 1.1172584  | 0.4384875  | 2.548   | 0.0125 * |
| age         | -0.0777305 | 0.0939656  | -0.827  | 0.4103   |
| SES         | 0.0491788  | 0.0510354  | 0.964   | 0.3378   |
| ADI-R total | 0.0345292  | 0.0335362  | 1.030   | 0.3060   |
| IQ          | 0.0160719  | 0.0086403  | 1.860   | 0.0661   |
| loc-to-glo  | -0.0092072 | 0.0078353  | -1.175  | 0.2431   |
| glo-to-loc  | 0.0167477  | 0.0084872  | 1.973   | 0.0515 . |

|                       |            |           |        |        |
|-----------------------|------------|-----------|--------|--------|
| expressive vocabulary | 0.0001902  | 0.0233226 | 0.008  | 0.9935 |
| sentence repetition   | -0.0040782 | 0.0091246 | -0.447 | 0.6560 |

---

Signif. codes: 0 '\*\*\*' 0.001 '\*\*' 0.01 '\*' 0.05 '.' 0.1 ' ' 1



## Linear model results for proactive interference list 3

TD groups:

|                       | Estimate  | Std. Error | t value | Pr(> t ) |
|-----------------------|-----------|------------|---------|----------|
| (Intercept)           | -2.652529 | 1.205375   | -2.201  | 0.0303 * |
| bilinguals            | 0.216986  | 0.296649   | 0.731   | 0.4664   |
| age                   | 0.038777  | 0.172882   | 0.224   | 0.8230   |
| SES                   | -0.008056 | 0.051192   | -0.157  | 0.8753   |
| loc-to-glo            | -0.002464 | 0.012502   | -0.197  | 0.8442   |
| glo-to-loc            | -0.003285 | 0.004950   | -0.664  | 0.5087   |
| expressive vocabulary | 0.042811  | 0.028088   | 1.524   | 0.1309   |
| sentence repetition   | -0.009646 | 0.007825   | -1.233  | 0.2208   |

---

Signif. codes: 0 '\*\*\*' 0.001 '\*\*' 0.01 '\*' 0.05 '.' 0.1 ' ' 1

Autistic groups:

|             | Estimate  | Std. Error | t value | Pr(> t ) |
|-------------|-----------|------------|---------|----------|
| (Intercept) | -3.510409 | 1.975780   | -1.777  | 0.0790 . |
| bilinguals  | 0.658751  | 0.505198   | 1.304   | 0.1956   |
| age         | 0.155336  | 0.108261   | 1.435   | 0.1548   |
| SES         | -0.038620 | 0.058800   | -0.657  | 0.5130   |
| ADI-R total | -0.022001 | 0.038638   | -0.569  | 0.5705   |
| IQ          | 0.012017  | 0.009955   | 1.207   | 0.2305   |
| loc-to-glo  | -0.016872 | 0.009027   | -1.869  | 0.0649 . |
| glo-to-loc  | 0.024778  | 0.009778   | 2.534   | 0.0130 * |

|                       |           |          |        |        |
|-----------------------|-----------|----------|--------|--------|
| expressive vocabulary | -0.015085 | 0.026871 | -0.561 | 0.5759 |
| sentence repetition   | 0.005719  | 0.010513 | 0.544  | 0.5878 |

---

Signif. codes: 0 '\*\*\*' 0.001 '\*\*' 0.01 '\*' 0.05 '.' 0.1 ' ' 1

## Autism effects

Linear model results for listening span scores

Monolingual groups:

|                       | Estimate  | Std. Error | t value | Pr(> t )   |
|-----------------------|-----------|------------|---------|------------|
| (Intercept)           | 3.108826  | 2.223454   | 1.398   | 0.16542    |
| Autism                | -2.389098 | 0.796038   | -3.001  | 0.00346 ** |
| age                   | -0.066664 | 0.210839   | -0.316  | 0.75258    |
| SES                   | 0.147513  | 0.105352   | 1.400   | 0.16482    |
| loc-to-glo            | 0.026286  | 0.013062   | 2.012   | 0.04710 *  |
| glo-to-loc            | -0.016520 | 0.009648   | -1.712  | 0.09019 .  |
| expressive vocabulary | 0.015037  | 0.042816   | 0.351   | 0.72624    |
| sentence repetition   | 0.031356  | 0.016000   | 1.960   | 0.05305 .  |
| ---                   |           |            |         |            |

Signif. codes: 0 '\*\*\*' 0.001 '\*\*' 0.01 '\*' 0.05 '.' 0.1 ' ' 1

Bilingual groups:

|                       | Estimate | Std. Error | t value | Pr(> t ) |
|-----------------------|----------|------------|---------|----------|
| (Intercept)           | 3.93040  | 2.90545    | 1.353   | 0.17960  |
| Autism                | 0.39933  | 0.67111    | 0.595   | 0.55335  |
| age                   | 0.27664  | 0.32239    | 0.858   | 0.39317  |
| SES                   | -0.18729 | 0.11982    | -1.563  | 0.12162  |
| home language history | 0.00436  | 0.01980    | 0.220   | 0.82627  |
| current language use  | 0.02630  | 0.02850    | 0.923   | 0.35873  |

|                       |          |         |        |            |
|-----------------------|----------|---------|--------|------------|
| loc-to-glo            | 0.07793  | 0.04209 | 1.852  | 0.06743 .  |
| glo-to-loc            | 0.01727  | 0.02434 | 0.709  | 0.48002    |
| expressive vocabulary | -0.08024 | 0.07242 | -1.108 | 0.27085    |
| sentence repetition   | 0.05389  | 0.02022 | 2.665  | 0.00916 ** |

---

Signif. codes: 0 '\*\*\*' 0.001 '\*\*' 0.01 '\*' 0.05 '.' 0.1 ' ' 1

## Linear model results for syntactic interference word recall scores

## Monolingual groups:

|                       | Estimate  | Std. Error | t value | Pr(> t )     |
|-----------------------|-----------|------------|---------|--------------|
| (Intercept)           | 10.079798 | 2.098961   | 4.802   | 6.06e-06 *** |
| Autism                | -3.322128 | 0.751467   | -4.421  | 2.69e-05 *** |
| age                   | -0.075568 | 0.199034   | -0.380  | 0.70506      |
| SES                   | -0.270150 | 0.099453   | -2.716  | 0.00788 **   |
| loc-to-glo            | 0.001037  | 0.012331   | 0.084   | 0.93319      |
| glo-to-loc            | 0.006055  | 0.009107   | 0.665   | 0.50780      |
| expressive vocabulary | 0.058813  | 0.040419   | 1.455   | 0.14905      |
| sentence repetition   | 0.045795  | 0.015104   | 3.032   | 0.00316 **   |

---

Signif. codes: 0 '\*\*\*' 0.001 '\*\*' 0.01 '\*' 0.05 '.' 0.1 ' ' 1

## Bilingual groups:

|                       | Estimate   | Std. Error | t value | Pr(> t )     |
|-----------------------|------------|------------|---------|--------------|
| (Intercept)           | 8.9958086  | 2.5135172  | 3.579   | 0.000564 *** |
| Autism                | -1.6550794 | 0.5805776  | -2.851  | 0.005433 **  |
| age                   | -0.4048052 | 0.2789010  | -1.451  | 0.150216     |
| SES                   | 0.1860760  | 0.1036573  | 1.795   | 0.076070     |
| home language history | 0.0070850  | 0.0171332  | 0.414   | 0.680229     |
| current language use  | 0.0082400  | 0.0246571  | 0.334   | 0.739036     |
| loc-to-glo            | -0.0531194 | 0.0364102  | -1.459  | 0.148148     |
| glo-to-loc            | 0.0013045  | 0.0210593  | 0.062   | 0.950748     |

|                       |           |           |       |            |
|-----------------------|-----------|-----------|-------|------------|
| expressive vocabulary | 0.1533059 | 0.0626480 | 2.447 | 0.016388 * |
| sentence repetition   | 0.0001031 | 0.0174967 | 0.006 | 0.995310   |

---

Signif. codes: 0 '\*\*\*' 0.001 '\*\*' 0.01 '\*' 0.05 '.' 0.1 ' ' 1

Linear model results for sentence comprehension in the syntactic interference word recall task

Monolingual groups:

|                       | Estimate  | Std. Error | t value | Pr(> t )     |
|-----------------------|-----------|------------|---------|--------------|
| (Intercept)           | 12.134666 | 2.136105   | 5.681   | 1.56e-07 *** |
| Autism                | -3.281655 | 0.764765   | -4.291  | 4.39e-05 *** |
| age                   | -0.513194 | 0.202557   | -2.534  | 0.01298 *    |
| SES                   | -0.045078 | 0.101213   | -0.445  | 0.65709      |
| loc-to-glo            | 0.014533  | 0.012549   | 1.158   | 0.24981      |
| glo-to-loc            | -0.011354 | 0.009269   | -1.225  | 0.22369      |
| expressive vocabulary | 0.068202  | 0.041134   | 1.658   | 0.10072      |
| sentence repetition   | 0.044227  | 0.015371   | 2.877   | 0.00499 **   |

---

Signif. codes: 0 '\*\*\*' 0.001 '\*\*' 0.01 '\*' 0.05 '.' 0.1 ' ' 1

Bilingual groups:

|                       | Estimate  | Std. Error | t value | Pr(> t )   |
|-----------------------|-----------|------------|---------|------------|
| (Intercept)           | 6.689996  | 2.308284   | 2.898   | 0.00474 ** |
| Autism                | -0.379886 | 0.533172   | -0.713  | 0.47804    |
| age                   | -0.480033 | 0.256128   | -1.874  | 0.06422    |
| SES                   | 0.084612  | 0.095193   | 0.889   | 0.37651    |
| home language history | 0.008296  | 0.015734   | 0.527   | 0.59936    |
| current language use  | 0.009872  | 0.022644   | 0.436   | 0.66393    |
| loc-to-glo            | -0.014330 | 0.033437   | -0.429  | 0.66928    |
| glo-to-loc            | -0.024976 | 0.019340   | -1.291  | 0.19993    |

|                       |          |          |       |            |
|-----------------------|----------|----------|-------|------------|
| expressive vocabulary | 0.189069 | 0.057533 | 3.286 | 0.00146 ** |
| sentence repetition   | 0.010143 | 0.016068 | 0.631 | 0.52953    |

---

Signif. codes: 0 '\*\*\*' 0.001 '\*\*' 0.01 '\*' 0.05 '.' 0.1 ' ' 1



## Linear model results for proactive interference list 2

## Monolingual groups:

|                       | Estimate   | Std. Error | t value | Pr(> t ) |
|-----------------------|------------|------------|---------|----------|
| (Intercept)           | -0.5724066 | 1.1294394  | -0.507  | 0.6135   |
| Autism                | -0.7816080 | 0.4043604  | -1.933  | 0.0563   |
| age                   | -0.0577123 | 0.1070993  | -0.539  | 0.5913   |
| SES                   | 0.0382177  | 0.0535150  | 0.714   | 0.4769   |
| loc-to-glo            | -0.0092814 | 0.0066351  | -1.399  | 0.1652   |
| glo-to-loc            | -0.0005149 | 0.0049007  | -0.105  | 0.9166   |
| expressive vocabulary | 0.0075726  | 0.0217492  | 0.348   | 0.7285   |
| sentence repetition   | -0.0094432 | 0.0081275  | -1.162  | 0.2483   |

---

Signif. codes: 0 '\*\*\*' 0.001 '\*\*' 0.01 '\*' 0.05 '.' 0.1 ' ' 1

## Bilingual groups:

|                       | Estimate  | Std. Error | t value | Pr(> t )              |
|-----------------------|-----------|------------|---------|-----------------------|
| (Intercept)           | -0.982192 | 1.187311   | -0.827  | 0.4103                |
| Autism                | 0.571664  | 0.274248   | 2.084   | 0.0400 * <sup>1</sup> |
| age                   | -0.191097 | 0.131744   | -1.451  | 0.1505                |
| SES                   | -0.022463 | 0.048965   | -0.459  | 0.6475                |
| home language history | 0.009246  | 0.008093   | 1.142   | 0.2563                |
| current language use  | -0.008949 | 0.011647   | -0.768  | 0.4443                |
| loc-to-glo            | 0.040511  | 0.017199   | 2.355   | 0.0207 *              |
| glo-to-loc            | -0.006064 | 0.009948   | -0.610  | 0.5437                |

|                       |           |          |        |          |
|-----------------------|-----------|----------|--------|----------|
| expressive vocabulary | 0.066377  | 0.029593 | 2.243  | 0.0274 * |
| sentence repetition   | -0.010417 | 0.008265 | -1.260 | 0.2109   |

---

Signif. codes: 0 '\*\*\*' 0.001 '\*\*' 0.01 '\*' 0.05 '.' 0.1 ' ' 1

<sup>1</sup> Note: This effect does not reach significance after corrections for multiple comparisons

## Linear model results for proactive interference list 3

## Monolingual groups:

|                       | Estimate   | Std. Error | t value | Pr(> t )   |
|-----------------------|------------|------------|---------|------------|
| (Intercept)           | -1.8376597 | 1.1003803  | -1.670  | 0.09831    |
| Autism                | -0.6535959 | 0.3939567  | -1.659  | 0.10051    |
| age                   | 0.0440049  | 0.1043438  | 0.422   | 0.67421    |
| SES                   | 0.0607148  | 0.0521382  | 1.164   | 0.24723    |
| loc-to-glo            | -0.0190807 | 0.0064644  | -2.952  | 0.00401 ** |
| glo-to-loc            | -0.0004711 | 0.0047746  | -0.099  | 0.92161    |
| expressive vocabulary | -0.0032202 | 0.0211896  | -0.152  | 0.87954    |
| sentence repetition   | -0.0054781 | 0.0079184  | -0.692  | 0.49079    |

---

Signif. codes: 0 '\*\*\*' 0.001 '\*\*' 0.01 '\*' 0.05 '.' 0.1 ' ' 1

## Bilingual groups:

|                       | Estimate   | Std. Error | t value | Pr(> t ) |
|-----------------------|------------|------------|---------|----------|
| (Intercept)           | -2.8444108 | 1.3866974  | -2.051  | 0.0432 * |
| Autism                | 0.2456045  | 0.3203024  | 0.767   | 0.4453   |
| age                   | 0.0724477  | 0.1538685  | 0.471   | 0.6389   |
| SES                   | -0.0963413 | 0.0571873  | -1.685  | 0.0956   |
| home language history | 0.0047937  | 0.0094523  | 0.507   | 0.6133   |
| current language use  | -0.0016641 | 0.0136032  | -0.122  | 0.9029   |
| loc-to-glo            | 0.0402536  | 0.0200873  | 2.004   | 0.0482 * |

|                       |            |           |        |        |
|-----------------------|------------|-----------|--------|--------|
| glo-to-loc            | -0.0008398 | 0.0116183 | -0.072 | 0.9425 |
| expressive vocabulary | 0.0467692  | 0.0345627 | 1.353  | 0.1795 |
| sentence repetition   | -0.0050227 | 0.0096528 | -0.520 | 0.6041 |

---

Signif. codes: 0 '\*\*\*' 0.001 '\*\*' 0.01 '\*' 0.05 '.' 0.1 ' ' 1
